# Supplementary material for: Iron(III)-Tannic Molecular Nanoparticles Enhance Autophagy effect and T1 MRI Contrast in Liver Cell Lines
Source: Springer Nature journal article supplement (doi:10.1038/s41598-018-25108-1), 2018-04-23
Supplement: 41598_2018_25108_MOESM1_ESM.pdf [file 41598_2018_25108_MOESM1_ESM.pdf]

# Supplementary Information

## Iron(III)-Tannic Molecular Nanoparticles Enhance Autophagy effect and T<sub>1</sub> MRI Contrast in Liver Cell Lines

Krungchanuchat Saowalak<sup>1,2,\*</sup>, Thongtem Titipun<sup>2,\*</sup>, Thongtem Somchai<sup>3</sup>, and Pilapong Chalermchai<sup>1,\*†</sup>

<sup>1</sup>Center of Excellence for Molecular Imaging (CEMI), Department of Radiologic Technology, Faculty of Associated Medical Sciences, Chiang Mai University, Chiang Mai 50200, Thailand

<sup>2</sup>Department of Chemistry, Faculty of Science, Chiang Mai University, Chiang Mai 50200, Thailand

<sup>3</sup>Department of Physics and Materials Science, Faculty of Science, Chiang Mai University, Chiang Mai 50200, Thailand

\*chalermchai.pilapong@cmu.ac.th, ttphongtem@yahoo.com

†these authors contributed equally to this work

### Method

**RT-PCR analysis.** The HepG2.2.15 cells were treated with different concentrations of the Fe-TA NPs for different lengths of time. The total RNA was extracted using a NucleoSpin® RNA II (MACHEREY-NAGEL GmbH & Co KG). RNA concentration and purity was measured by ultraviolet spectrophotometer. A total of 0.8 µg RNA was used to synthesize cDNA using the RevertAid™ First Strand cDNA Synthesis kit (Thermo Fisher Scientific Inc.) according to the manufacturer's instructions. Quantitative PCR was performed with 2 µL of cDNA, 300 nM of each primer (Integrated DNA Technologies, Inc.) and 10 µL of SybrGreen qPCR Master Mix (SensiFAST™ SYBR® No-ROX One-step kits, BIOLINE) and analyzed with the LightCycler96 Software (Roche, Switzerland). The cycle threshold values were used to calculate the normalized expression of LC3 and β-actin using the LightCycler® 96 Software 1.1. The sequences of the primer pairs are listed below:

β-actin, 5'-TAG-TTGC GTTACACCCTTTCTTG-3' / 5'-TCACCTTCA-CCGTTCCAGTT-3'

LC3, 5'-CATGA-GCGAGTTGGTCAAGAT-3' / 5'-TCGTCTTTCTCCT-GCTCGTAG-3'

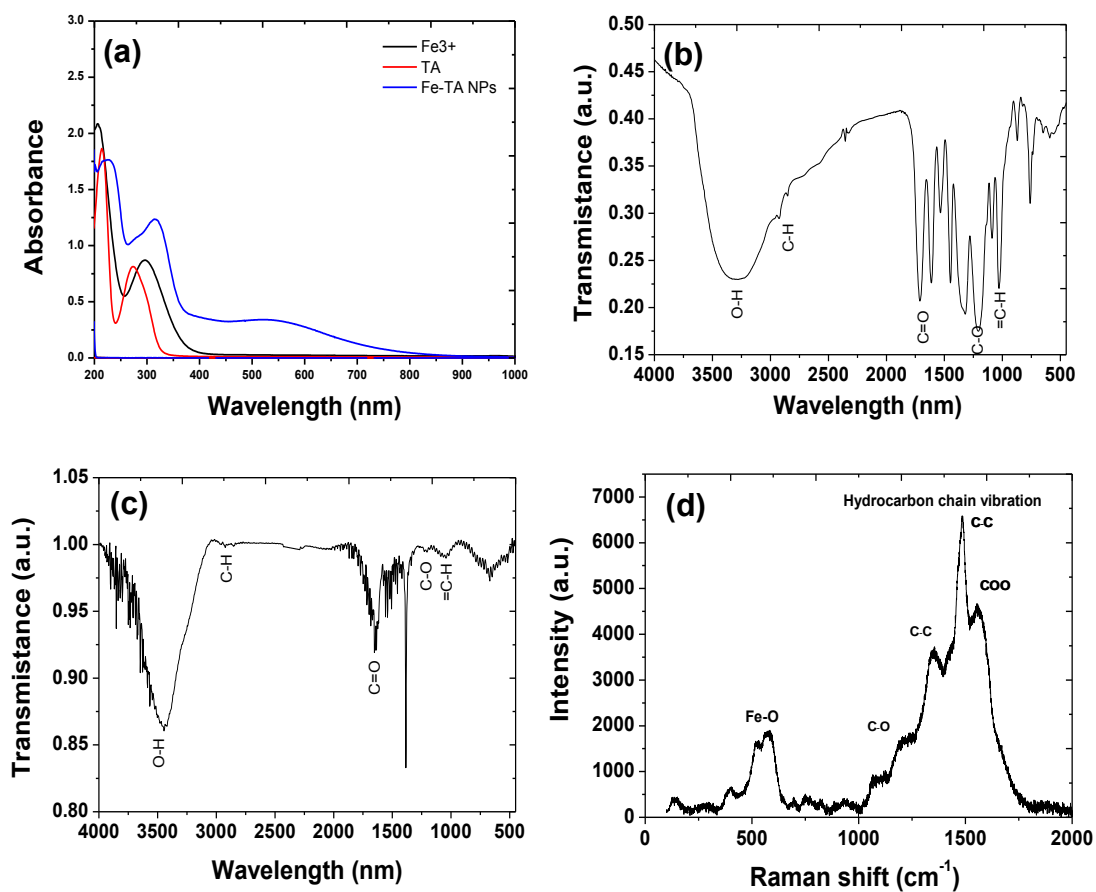

**Figure S1.** (a) UV-visible spectra of Fe(III), pure TA, and Fe-TA NPs; (b,c) FTIR spectra of pure TA acid and Fe-TA NPs; (d) Raman spectrum of Fe-TA NPs.

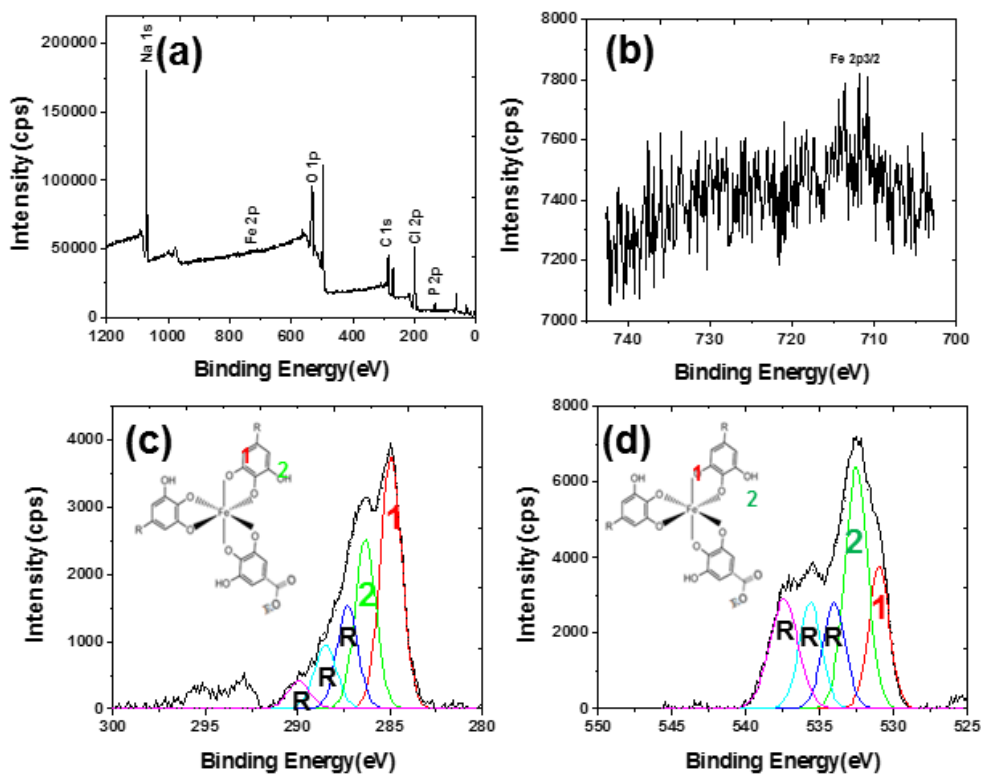

**Figure S2.** XPS analysis of the Fe-TA NPs. (a) Survey spectrum, (b) Fe 2p spectrum, (c) C 1s spectrum, and (d) O 1s spectrum.

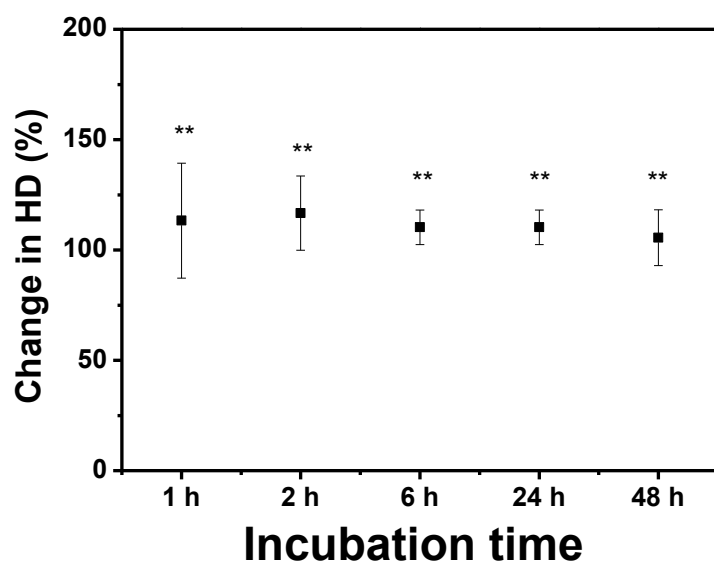

**Figure S3.** Time-dependent hydrodynamic size (HD) of the Fe-TA NPs in PBS containing 10% FBS buffer (\*\*  $p > 0.05$ , ANOVA). (HDs of the Fe-TA NPs were normalized with respect to those measured in PBS (100%).)

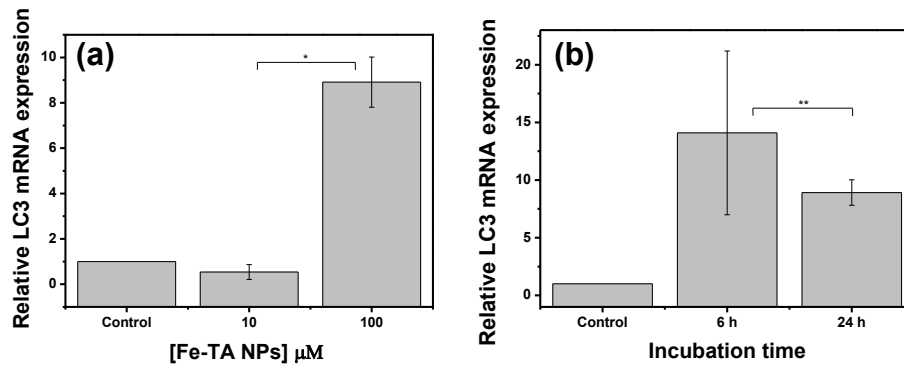

**Figure S4.** (a) The mRNA levels of LC3 in HepG2.2.15 cells treated with different concentrations of the Fe-TA NPs. (b) The mRNA levels of LC3 in HepG2.2.15 cells treated with 100 μM of the Fe-TA NPs for different lengths of time. (\* $p < 0.05$ , \*\* $p > 0.05$ ).

### HepG2.2.15 cells

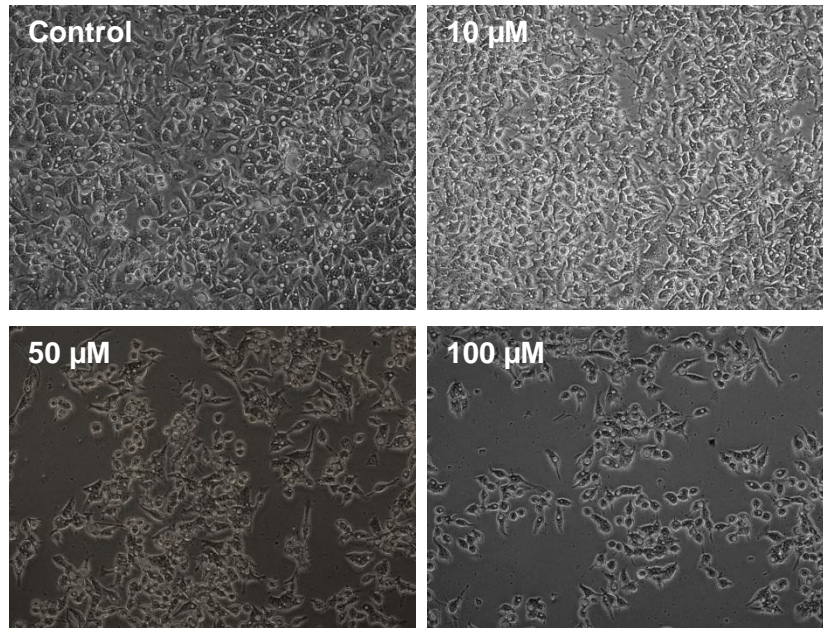

### AML12 cells

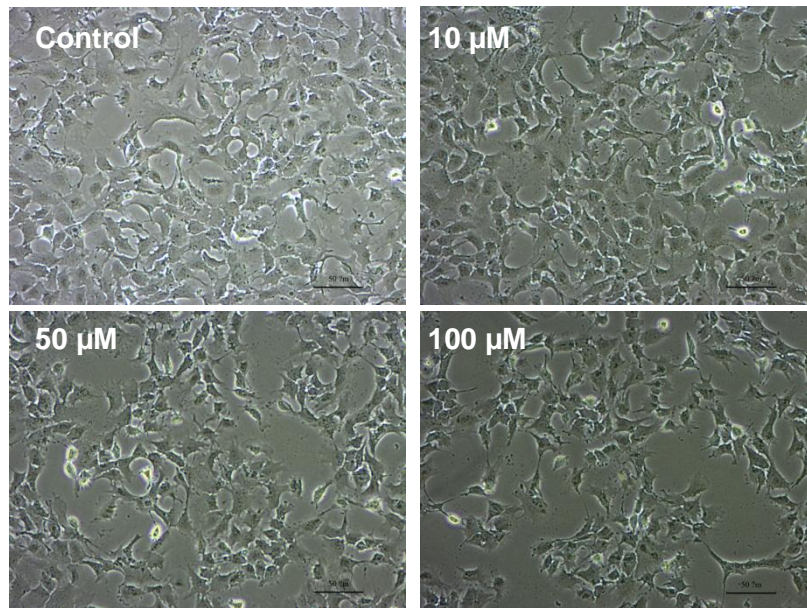

**Figure S5.** Cellular morphology analysis of (a) HepG2.2.15 cells and (b) AML12 cells after being treated with different concentrations of Fe-TA NPs for 24 h.

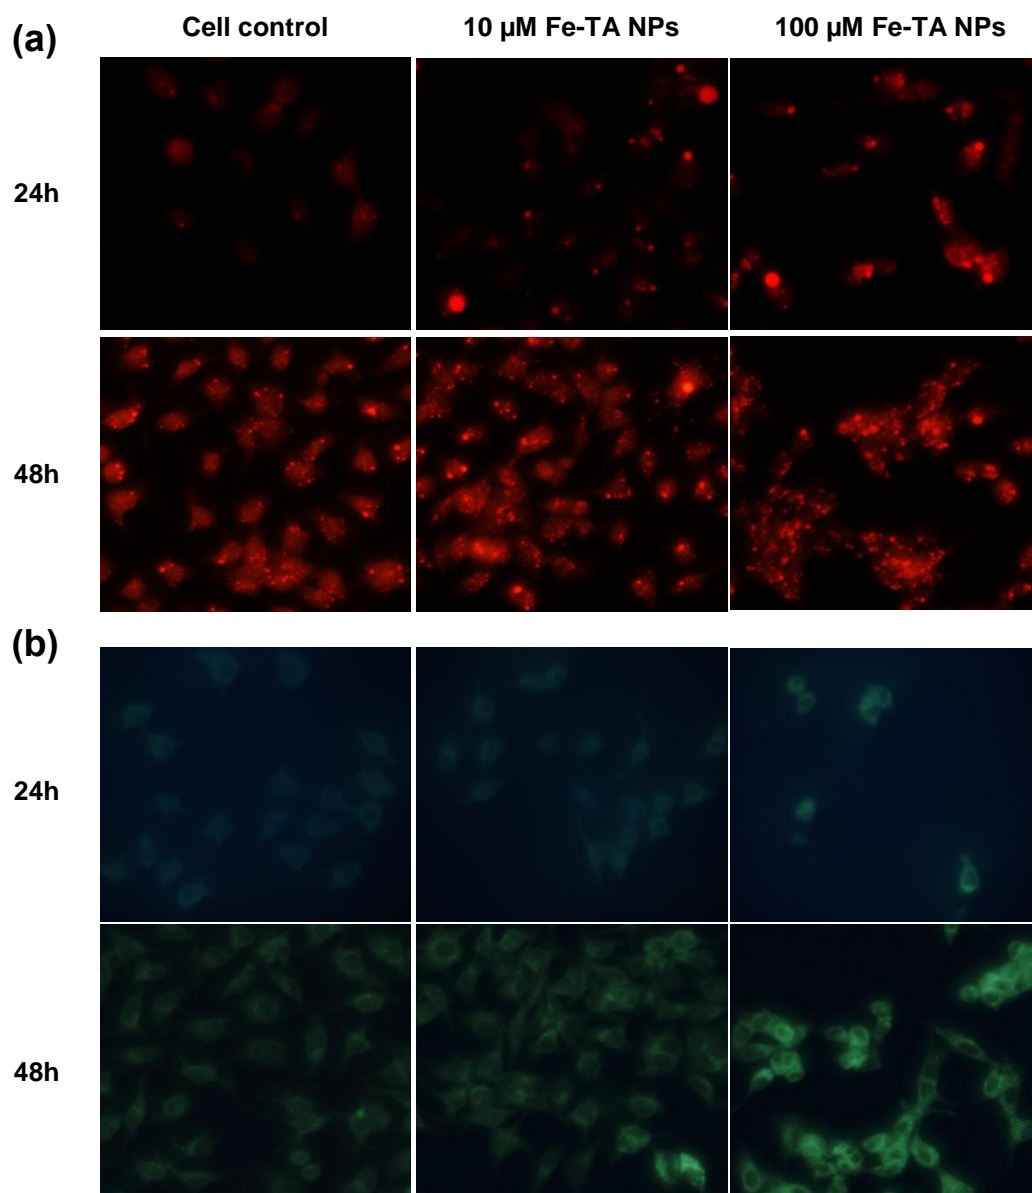

**Figure S6.** (a) Acridine orange (AO) staining and (b) monodansylcadaverine (MDC) staining of HepG2.2.15 cells after treatment with Fe-TA NPs for 24 h and 48 h.

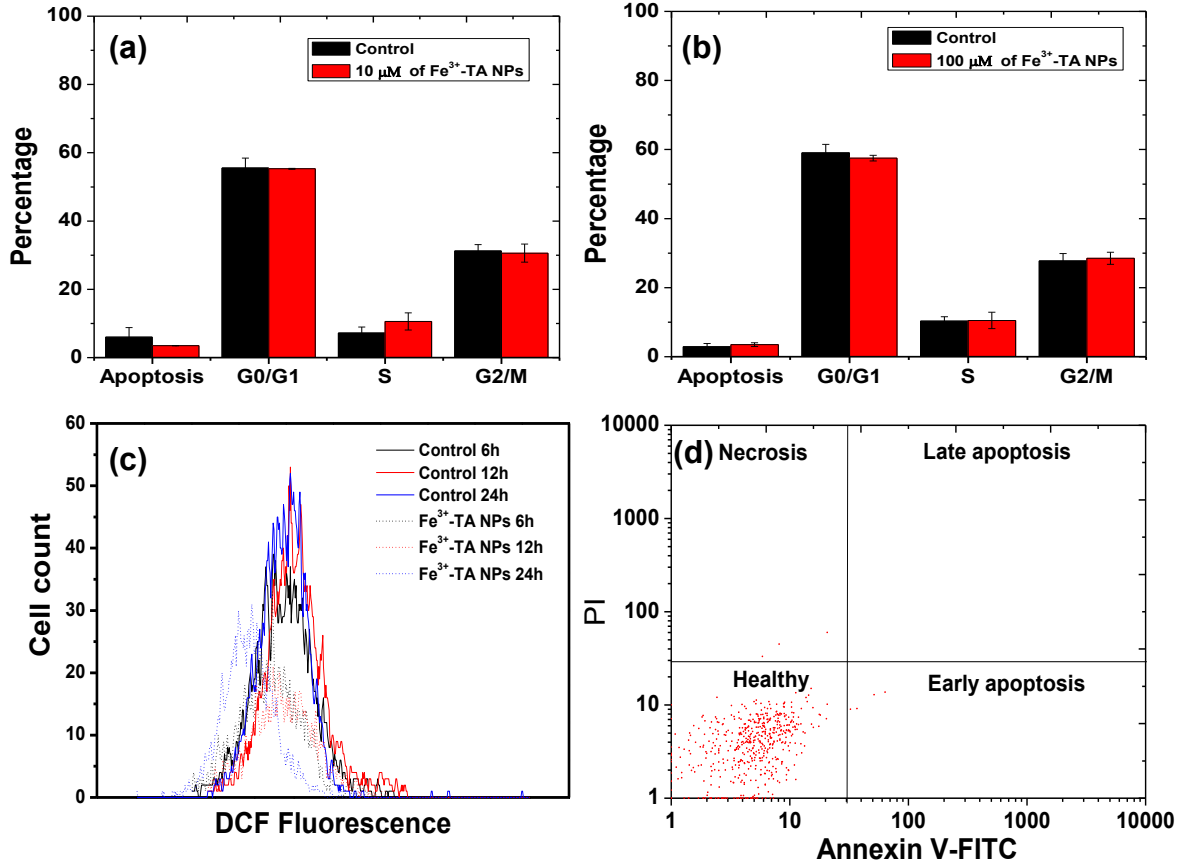

**Figure S7.** (a,b) Flow cytometric analysis of the cell cycle distribution, (c) flow cytometric analysis of the intracellular ROS, and (d) bi-parametric dot plot of annexin V-FITC/ propidium iodide (PI) co-staining (HepG2.2.15 cells).



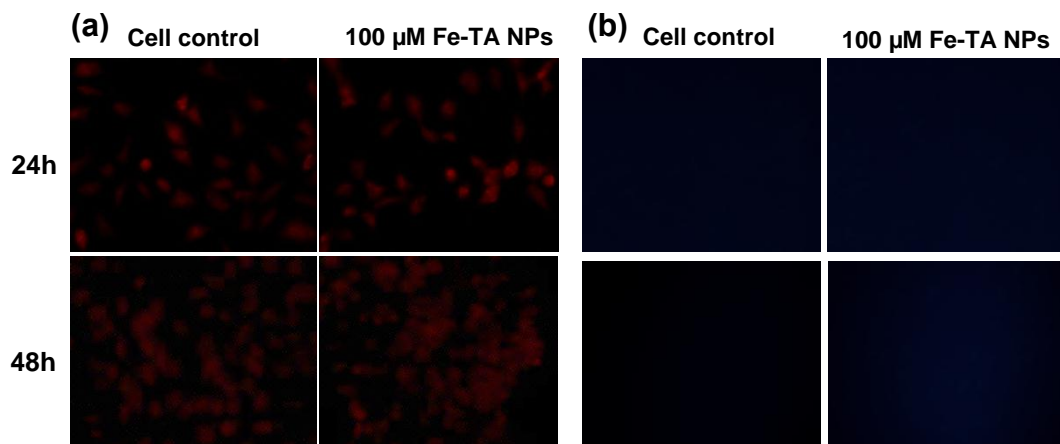

**Figure S8.** (a) Acridine orange (AO) staining and (b) monodansylcadaverine (MDC) staining of AML12 cells after treatment with Fe-TA NPs for 24 h and 48 h.

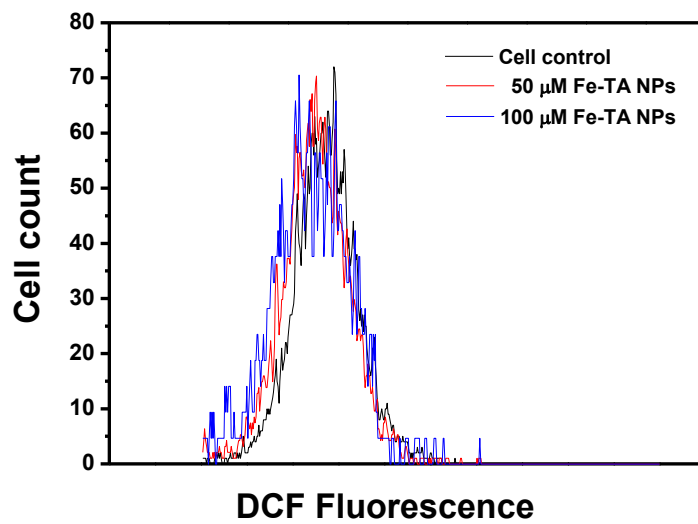

**Figure S9.** (c) flow cytometric analysis of the intracellular ROS of AML12 cells treated with different concentrations of Fe-TA NPs for 24 h.
